# Supplementary material for: Effect of anion type on the synthesis of mesoporous nanostructured MgO, and its excellent adsorption capacity for the removal of toxic heavy metal ions from water
Source: Royal Society of Chemistry journal article supplement (doi:10.1039/c5ra16837f), 2016-01-01
Supplement: c5ra16837f1.pdf [file c5ra16837f1.pdf]

## Electronic Supporting Information

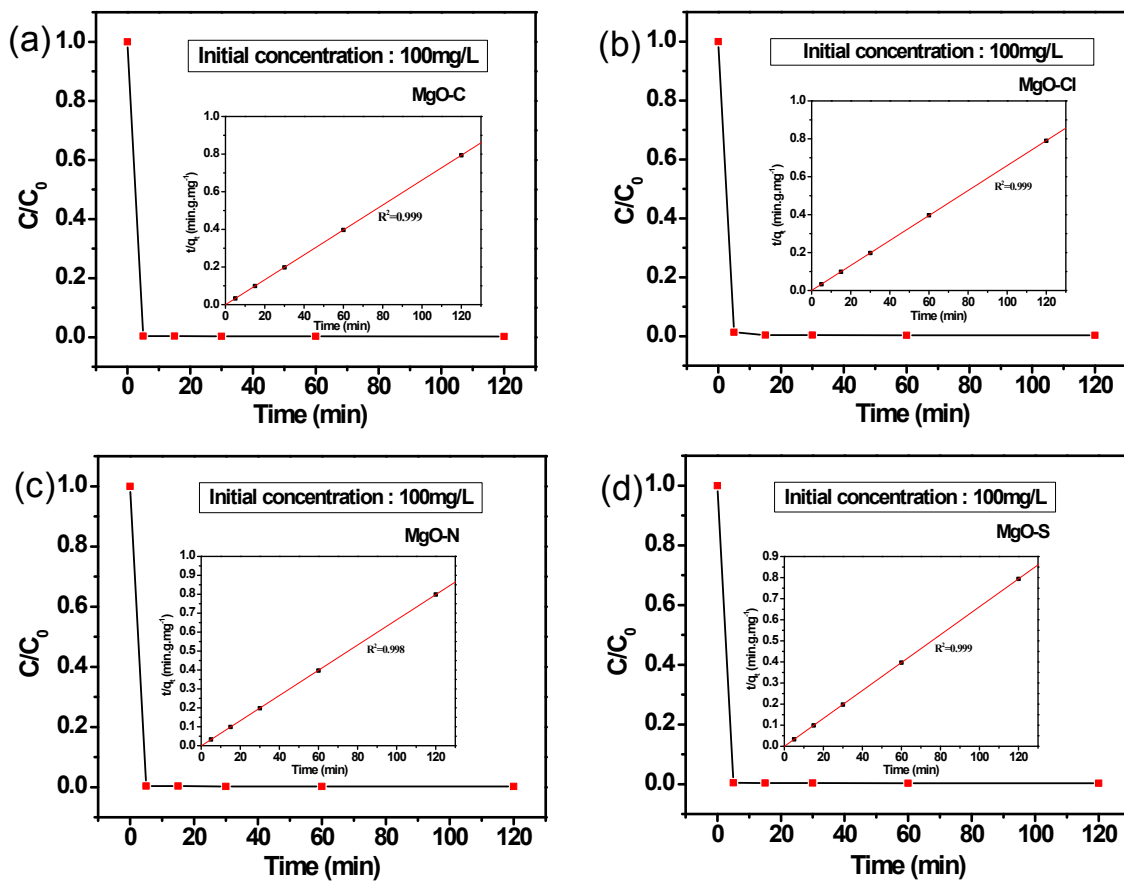

Fig. S1: Adsorption of Pb(II) ions with contact time for the samples: (a) MgO-C, (b) MgO-Cl, (c) MgO-N and (d) MgO-S. The insets show the corresponding kinetic plots.

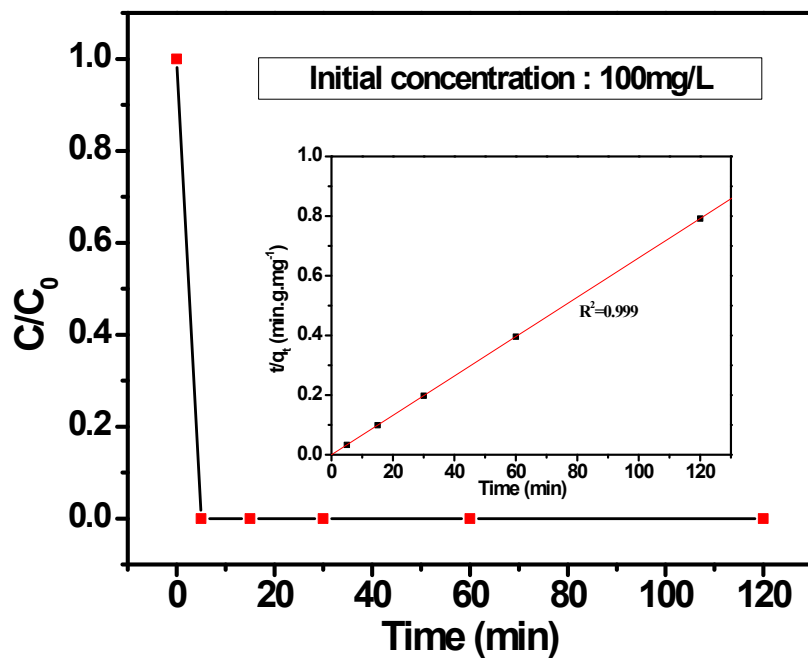

Fig. S2: Adsorption of Cd(II) ions with contact time for all the samples: MgO-C, MgO-Cl, MgO-N and MgO-S. The inset shows the corresponding kinetic plot.

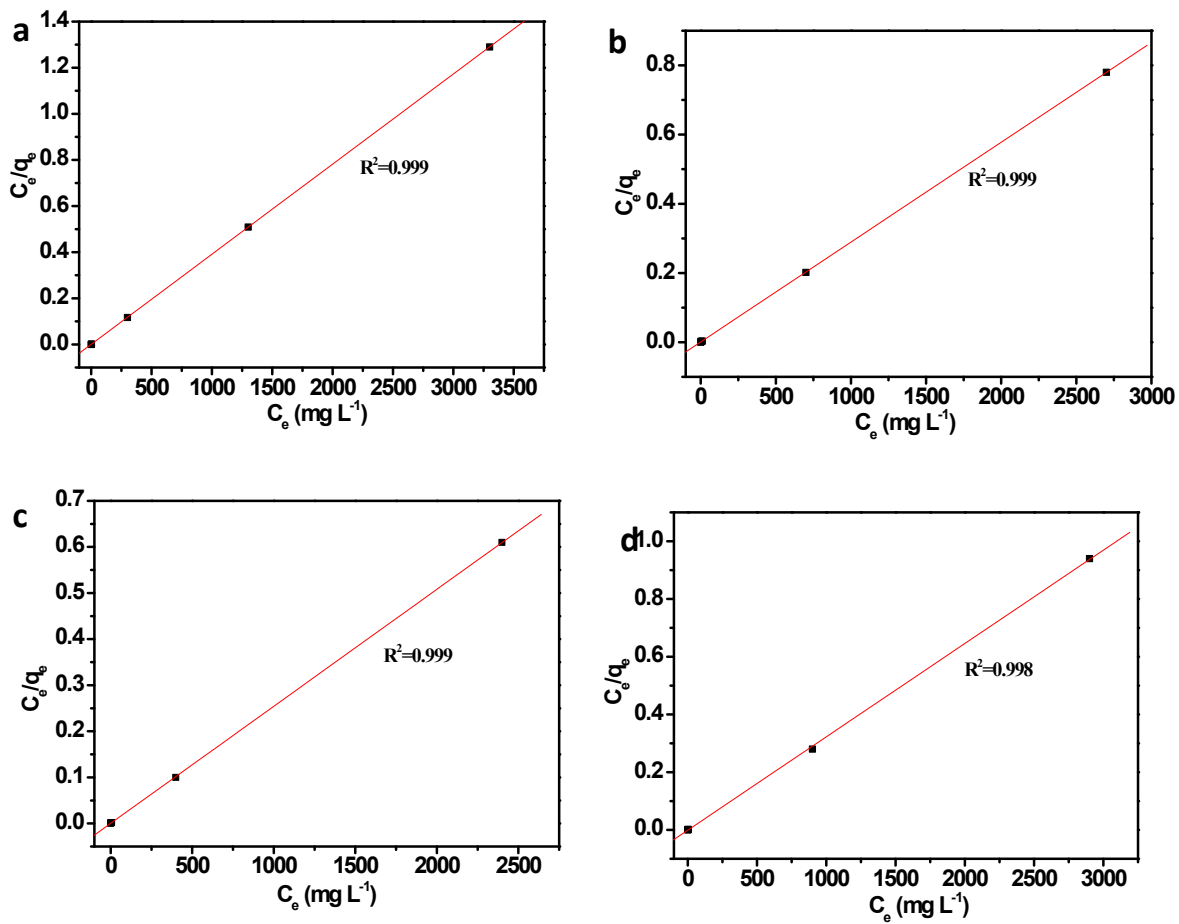

Fig. S3: Langmuir isotherms of Pb(II) ions adsorption on the samples: (a) MgO-C, (b) MgO-Cl, (c) MgO-N and (d) MgO-S.

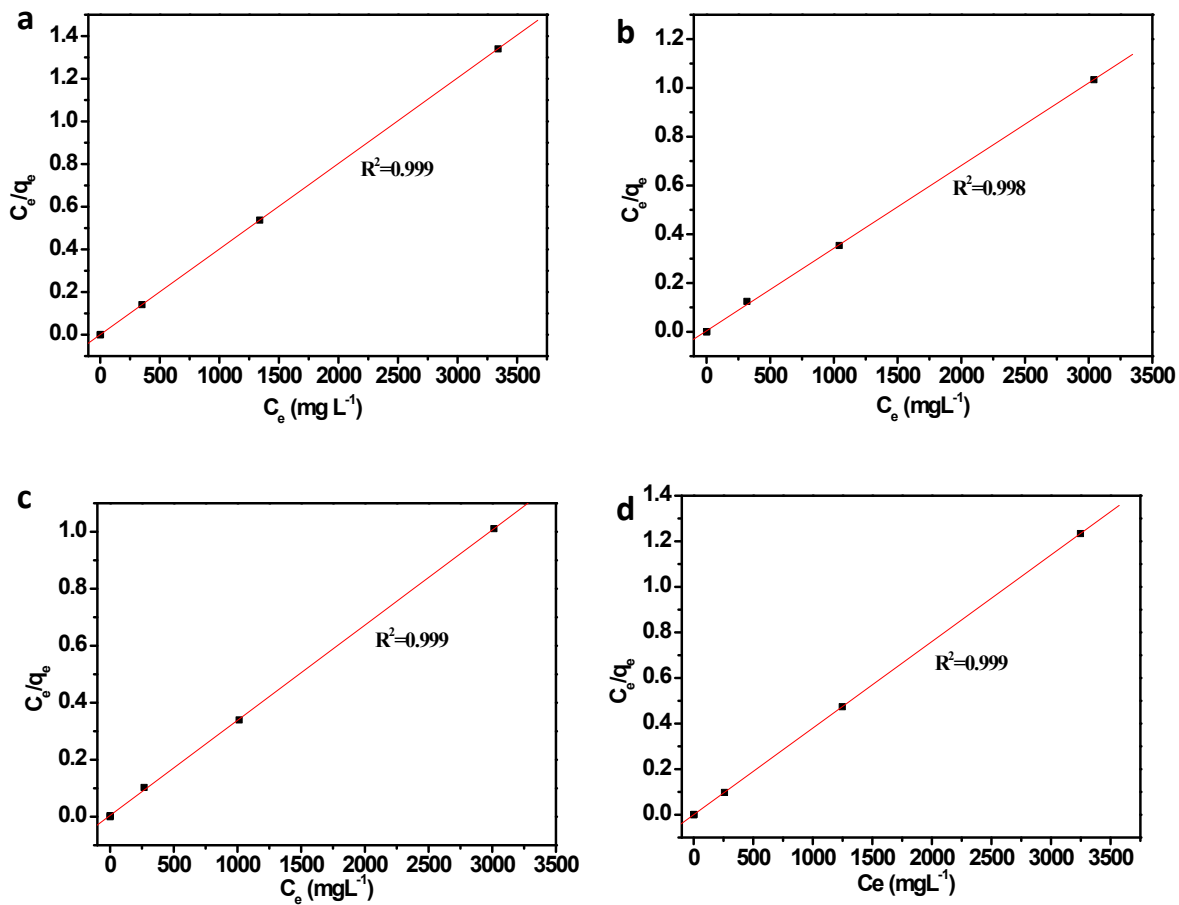

Fig. S4: Langmuir isotherms of Cd(II) ions adsorption on the samples: (a) MgO-C, (b) MgO-Cl, (c) MgO-N and (d) MgO-S.

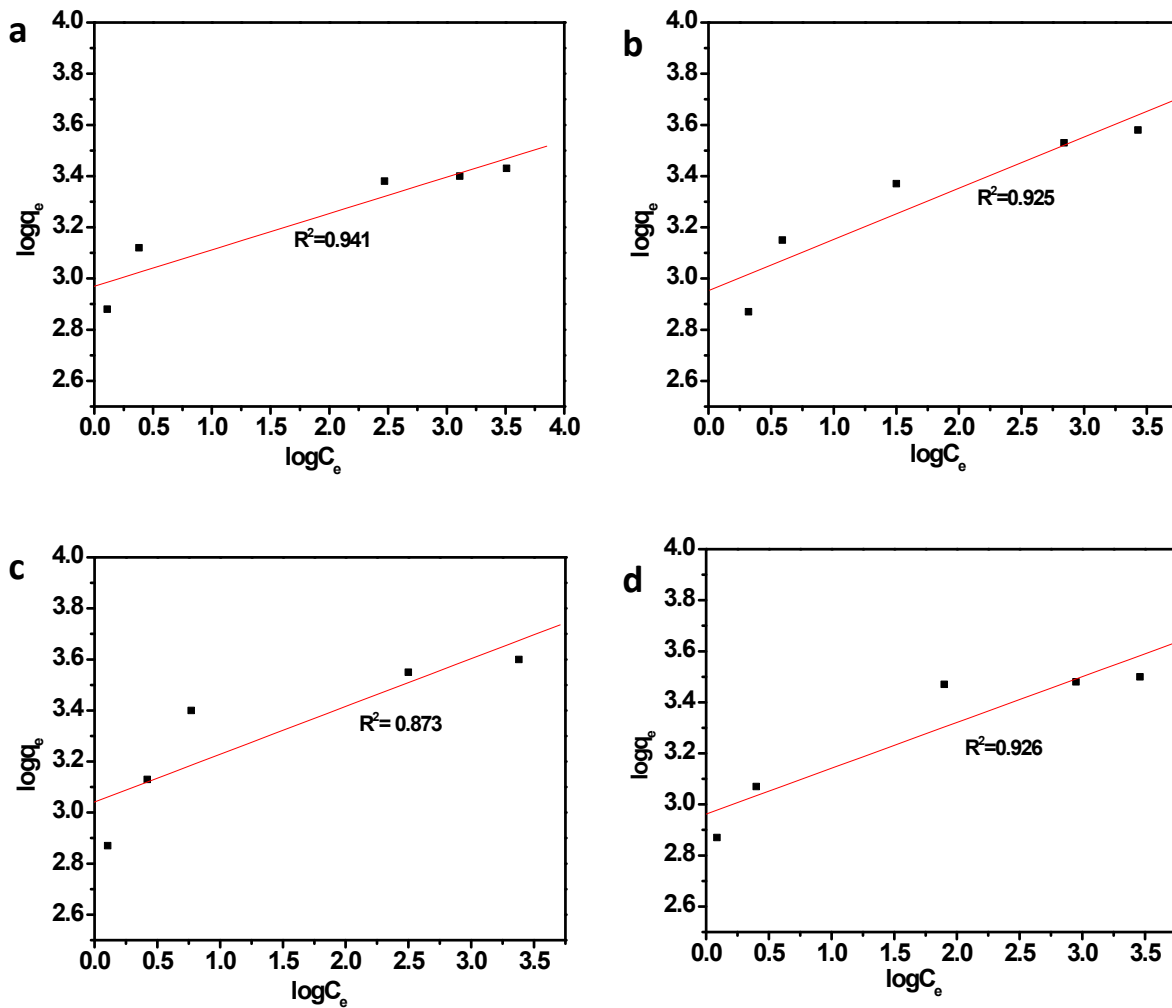

Fig. S5: Freundlich isotherms of Pb(II) ions adsorption on the samples: (a) MgO-C, (b) MgO-Cl, (c) MgO-N and (d) MgO-S.

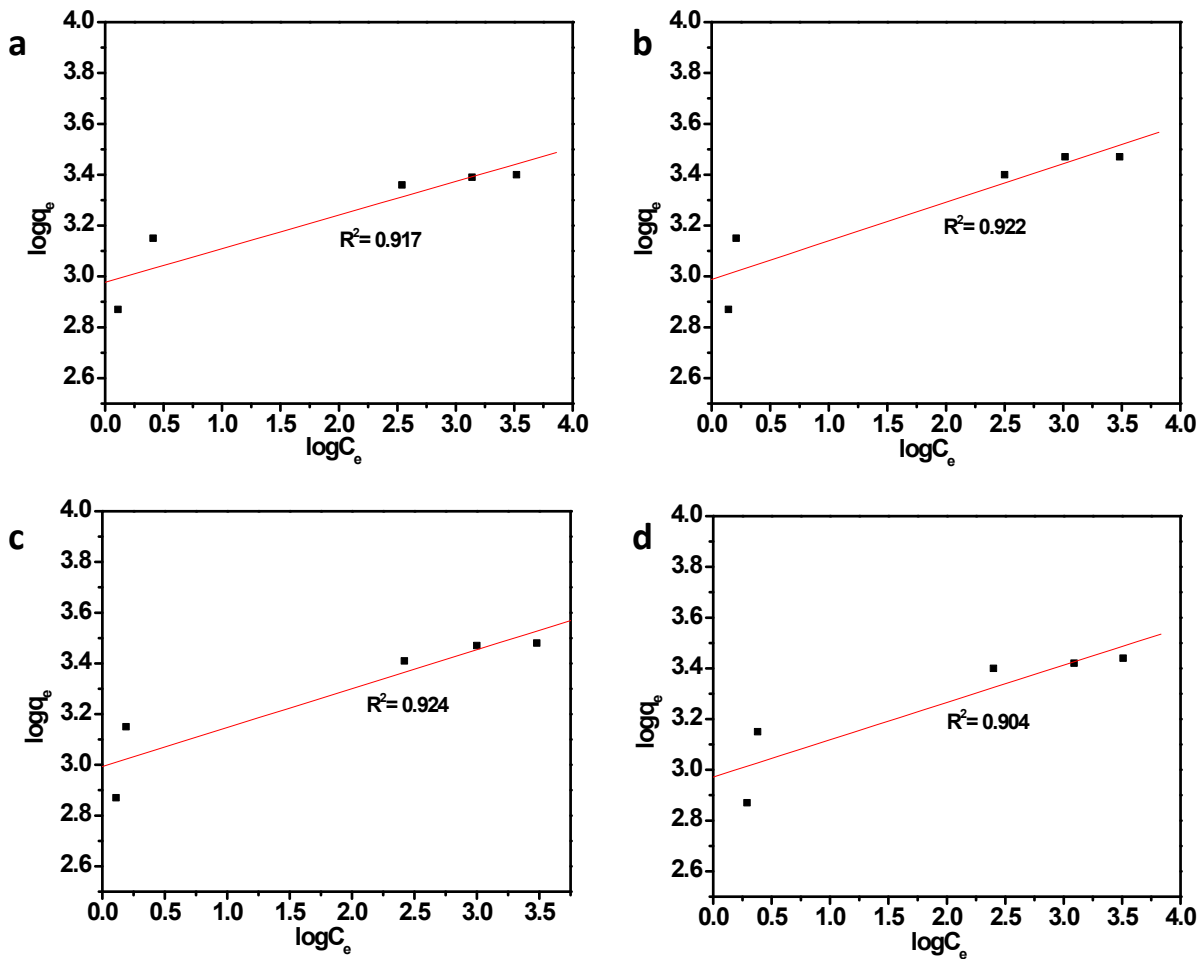

Fig. S6: Freundlich isotherms of Cd(II) ions adsorption on the samples: (a) MgO-C, (b) MgO-Cl, (c) MgO-N and (d) MgO-S.

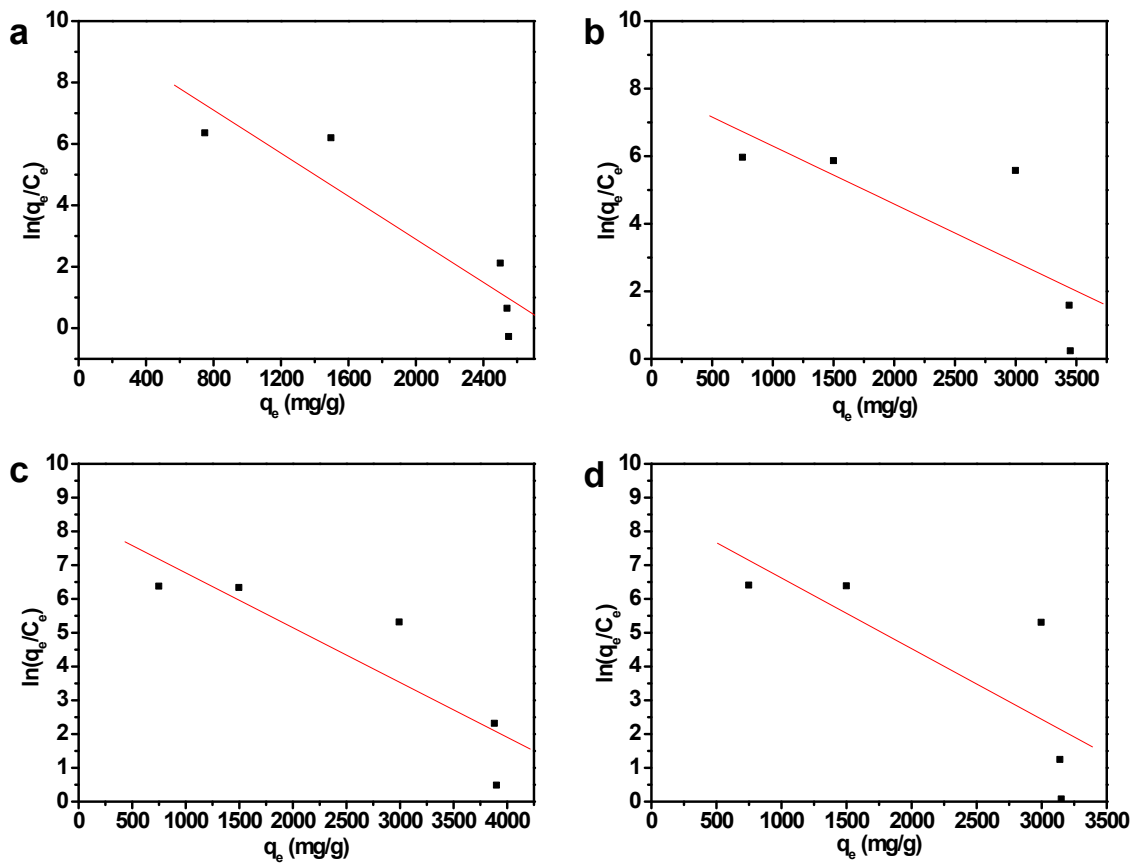

Fig. S7: The plots of  $\ln(q_e/C_e)$  Vs.  $q_e$  of Pb(II) ion adsorption on the samples: (a) MgO-C, (b) MgO-Cl, (c) MgO-N and (d) MgO-S.

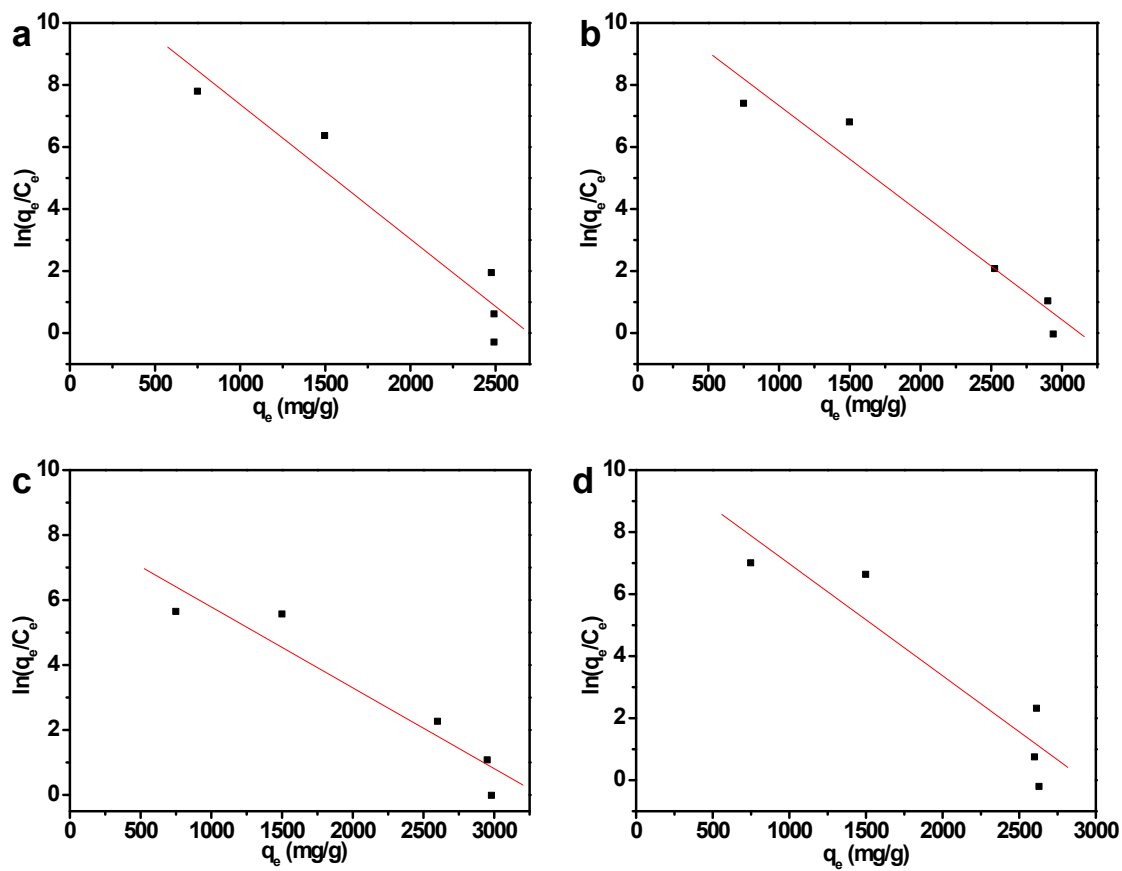

Fig. S8: The plots of  $\ln(q_e/C_e)$  Vs.  $q_e$  of Cd(II) ion adsorption on the samples: (a) MgO-C, (b) MgO-Cl, (c) MgO-N and (d) MgO-S.



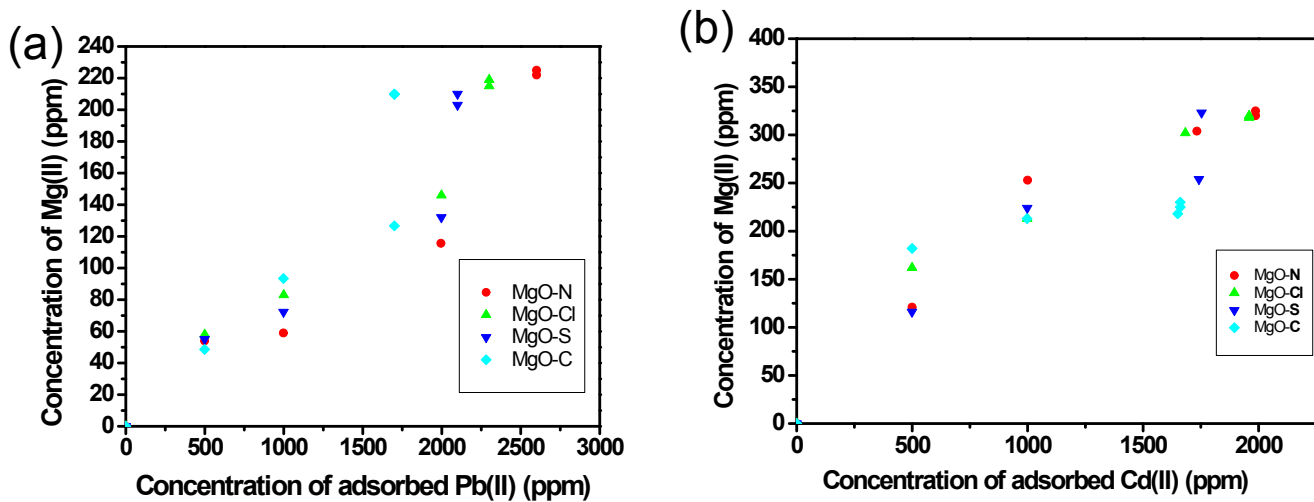

Fig. S9: Relationship between  $Mg^{2+}$  ion released and (a) Pb(II) and (b) Cd(II) ions adsorbed.

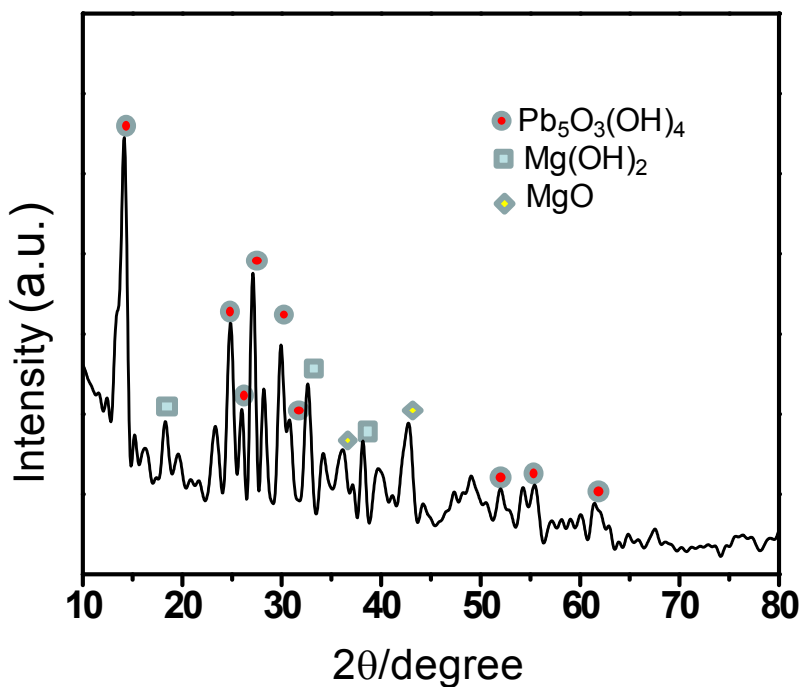

Fig. S10: XRD patterns of the samples after adsorption of Pb(II) with MgO.

Table S1: Parameters of kinetic model for the adsorption of Pb(II) and Cd(II) ions

| Heavy metal ions                             | Pb (II) |         |        |        | Cd (II) |         |        |        |
|----------------------------------------------|---------|---------|--------|--------|---------|---------|--------|--------|
|                                              | MgO-C   | MgO -Cl | MgO -N | MgO -S | MgO-C   | MgO -Cl | MgO -N | MgO -S |
| Sample ID                                    |         |         |        |        |         |         |        |        |
| $q_e$ (mg/g)                                 | 151.1   | 151.04  | 151.13 | 151.09 | 151.51  | 151.51  | 151.51 | 151.51 |
| $K_2$ (gmg <sup>-1</sup> min <sup>-1</sup> ) | 0.168   | 0.084   | 0.062  | 0.313  | 0.311   | 0.311   | 0.311  | 0.311  |
| $R^2$                                        | 0.999   | 0.999   | 0.998  | 0.999  | 0.999   | 0.999   | 0.999  | 0.999  |
